# Supplementary material for: A biomimetic hybrid material consisting of CaCO3 mesoporous microspheres and an alternating copolymer for reversed-phase HPLC
Source: Royal Society of Chemistry journal article supplement (doi:10.1039/c9tb01014a), 2019-01-01
Supplement: c9tb01014a1.pdf [file c9tb01014a1.pdf]

† Electronic Supplementary Information (ESI)

A biomimetic hybrid material consisting of CaCO<sub>3</sub> mesoporous microspheres and an alternating copolymer for reversed-phase HPLC

*Mai Mochida, Yuta Nagai, Hiroto Kumagai, Hiroaki Imai, Daniel Citterio and Yuki Hiruta\**

Department of Applied Chemistry, Keio University  
3-14-1 Hiyoshi, Kohoku-ku, Yokohama 223-8522, Japan.

\*To whom correspondence should be addressed.

Tel: +81 45 566 1568; Fax: +81 45 566 1568; Email: hiruta@aplc.keio.ac.jp

## Material characterizations

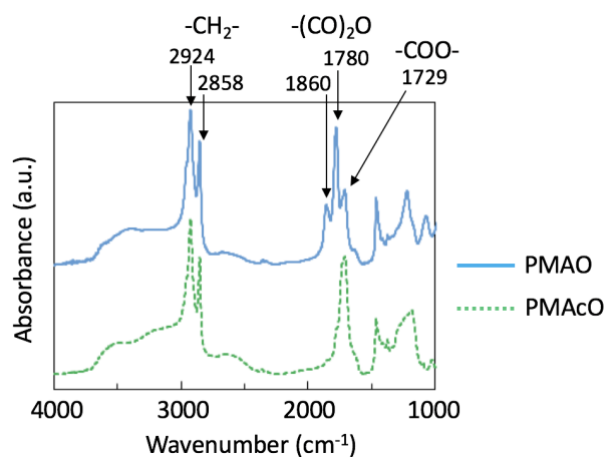

**Fig. S1** FT-IR spectra of PMAO and PMAcO.

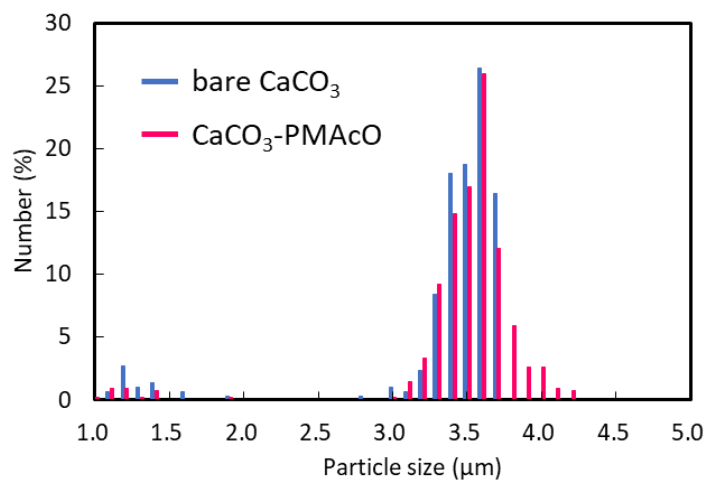

**Fig. S2** Particle size distributions of bare  $\text{CaCO}_3$  and  $\text{CaCO}_3$ -PMAcO ( $n = 400$ , measured from the SEM images shown in Fig. 2D and 2H of the main text).

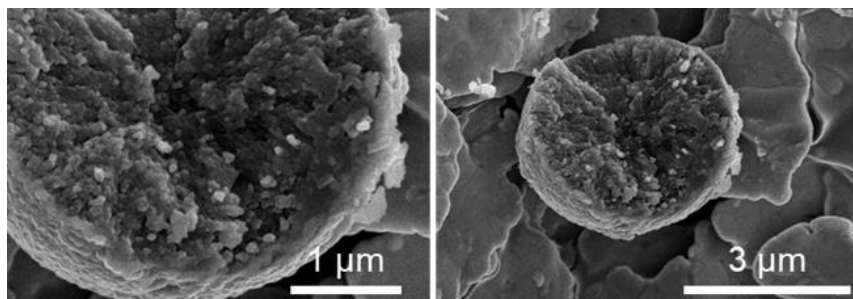

**Fig. S3** SEM images of the fracture surface of  $\text{CaCO}_3$ -PMAcO.

## Chromatographic results

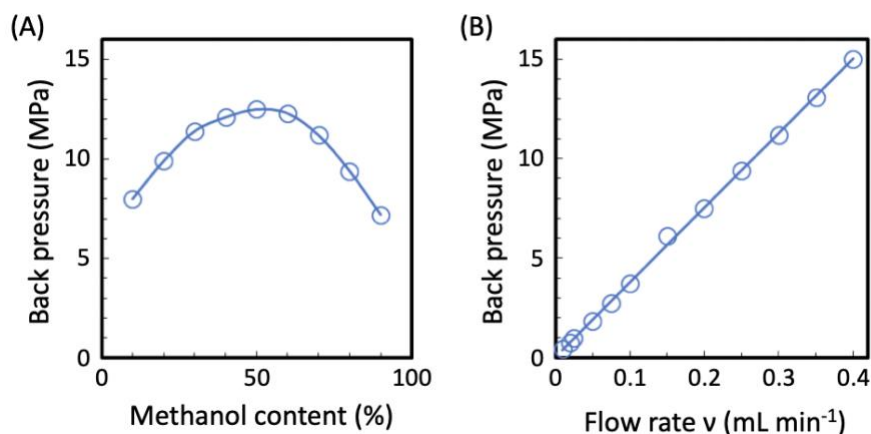

**Fig. S4** Back pressures of  $\text{CaCO}_3\text{-PMacO}$  column; (A) depending on mixing ratio of methanol/water mobile phase with flow rate at  $0.3 \text{ mL/min}$ ; (B) depending on flow rate with methanol/water (70/30, v/v) mobile phase.

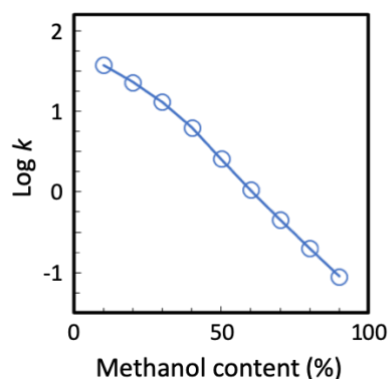

**Fig. S5** Retention factors of naphthalene in changing the mixture ratio of mobile phase for  $\text{CaCO}_3\text{-PMacO}$  column. A methanol/water mobile phase was flowed at  $0.3 \text{ mL/min}$ .

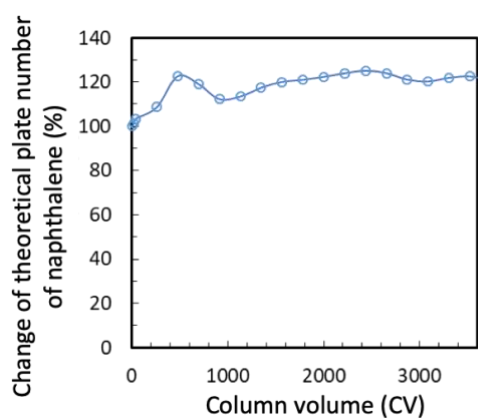

**Fig. S6** Relative change of the theoretical plate number of naphthalene upon continuous running of alkaline mobile phase (50/50 (v/v) methanol/pH 10.8  $\text{Na}_2\text{B}_4\text{O}_7$  buffer) in the case of  $\text{CaCO}_3\text{-PMacO}$  column; flow rate of mobile phase  $0.3 \text{ mL/min}$ ; experimental conditions equivalent to those in Fig. 4C of the main text.

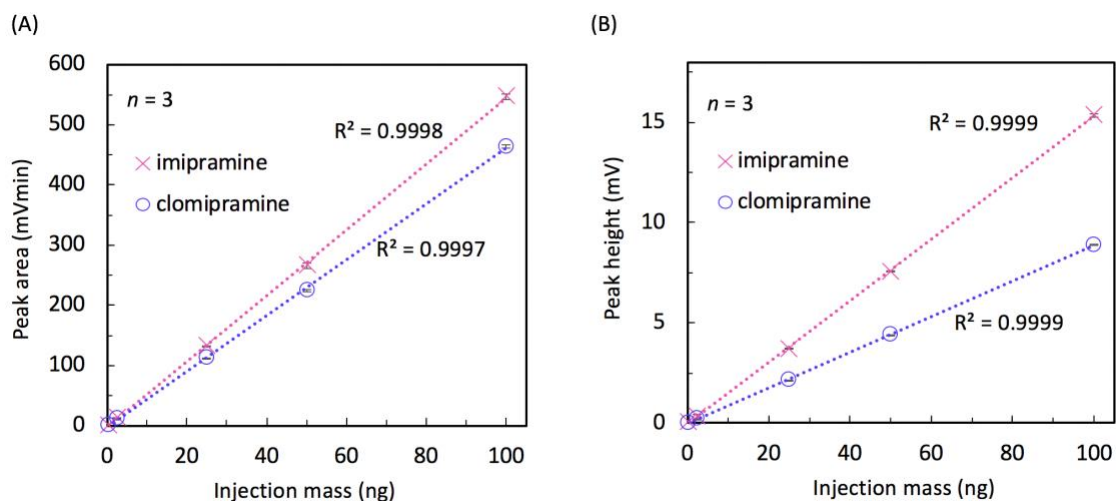

**Fig. S7** Calibration curves of two basic antidepressants (clomipramine and imipramine) based on the data in Figure 6B of main article (A) from peak areas, (B) from peak heights.

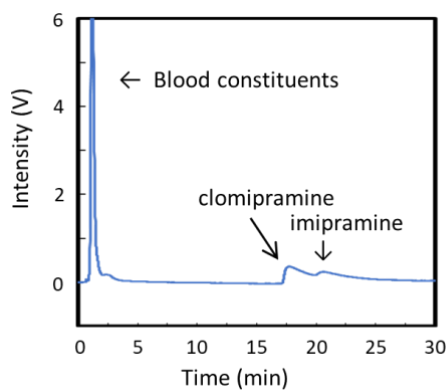

**Fig. S8** Chromatogram of the separation of basic antidepressants (clomipramine and imipramine) spiked into porcine whole blood with a ODS column.; a 80/20 (v/v) methanol/water was used as mobile phase at a flow rate of 0.3 mL/min.
